# Supplementary material
Source: PubMed Central journal article supplement (PMC3795411)
Supplement: NIHMS444192-supplement-supplement_1.pdf [file NIHMS444192-supplement-supplement_1.pdf]

*Supplementary Material*

## **Multiplex Genome Engineering Using CRISPR/Cas Systems**

Le Cong<sup>1,2,\*</sup>, F. Ann Ran<sup>1,4,\*</sup>, David Cox<sup>1,3</sup>, Shuailiang Lin<sup>1,5</sup>, Robert Barretto<sup>6</sup>, Naomi Habib<sup>1</sup>,  
Patrick D. Hsu<sup>1,4</sup>, Xuebing Wu<sup>7</sup>, Wenyan Jiang<sup>8</sup>, Luciano Marraffini<sup>8</sup>, and Feng Zhang<sup>1,†</sup>

<sup>1</sup> Broad Institute of MIT and Harvard  
7 Cambridge Center  
Cambridge, MA 02142, USA

McGovern Institute for Brain Research  
Department of Brain and Cognitive Sciences  
Department of Biological Engineering  
Massachusetts Institute of Technology  
Cambridge, MA 02139, USA

<sup>2</sup> Program in Biological and Biomedical Sciences  
Harvard Medical School  
Boston, MA 02115, USA

<sup>3</sup> Harvard-MIT Health Sciences and Technology  
Harvard Medical School  
Boston, MA 02115

<sup>4</sup> Department of Molecular and Cellular Biology  
Harvard University  
Cambridge, MA 02138, USA

<sup>5</sup> School of Life Sciences, Tsinghua University  
Beijing, 100084, China

<sup>6</sup> Department of Biochemistry and Molecular Biophysics  
College of Physicians and Surgeons, Columbia University  
New York, NY 10032, USA

<sup>7</sup> Computational and Systems Biology Graduate Program, and  
Koch Institute for Integrative Cancer Research  
Massachusetts Institute of Technology  
Cambridge, MA 02139, USA

<sup>8</sup> Laboratory of Bacteriology  
The Rockefeller University  
1230 York Ave.  
New York, NY 10065, USA

\*These authors contributed equally to this work.

†To whom correspondence should be addressed: [zhang@broadinstitute.org](mailto:zhang@broadinstitute.org).

## SUPPLEMENTARY MATERIALS AND METHODS

### *Cell culture and transfection*

Human embryonic kidney (HEK) cell line 293FT (Life Technologies) was maintained in Dulbecco's modified Eagle's Medium (DMEM) supplemented with 10% fetal bovine serum (HyClone), 2mM GlutaMAX (Life Technologies), 100U/mL penicillin, and 100µg/mL streptomycin at 37°C with 5% CO<sub>2</sub> incubation. Mouse neuro2A (N2A) cell line (ATCC) was maintained with DMEM supplemented with 5% fetal bovine serum (HyClone), 2mM GlutaMAX (Life Technologies), 100U/mL penicillin, and 100µg/mL streptomycin at 37°C with 5% CO<sub>2</sub>.

293FT or N2A cells were seeded into 24-well plates (Corning) one day prior to transfection at a density of 200,000 cells per well. Cells were transfected using Lipofectamine 2000 (Life Technologies) following the manufacturer's recommended protocol. For each well of a 24-well plate a total of 800ng plasmids was used.

### *Surveyor assay and sequencing analysis for genome modification*

293FT or N2A cells were transfected with plasmid DNA as described above. Cells were incubated at 37°C for 72 hours post transfection before genomic DNA extraction. Genomic DNA was extracted using the QuickExtract DNA extraction kit (Epicentre) following the manufacturer's protocol. Briefly, cells were resuspended in QuickExtract solution and incubated at 65°C for 15 minutes and 98°C for 10 minutes.

Genomic region surrounding the CRISPR target site for each gene was PCR amplified, and products were purified using QiaQuick Spin Column (Qiagen) following manufacturer's protocol. A total of 400ng of the purified PCR products were mixed with 2µl 10X Taq polymerase PCR buffer (Enzymatics) and ultrapure water to a final volume of 20µl, and subjected to a re-annealing process to enable heteroduplex formation: 95°C for 10min, 95°C to 85°C ramping at – 2°C/s, 85°C to 25°C at – 0.25°C/s, and 25°C hold for 1 minute. After re-annealing, products were treated with SURVEYOR nuclease and SURVEYOR enhancer S (Transgenomics) following the manufacturer's recommended protocol, and analyzed on 4-20% Novex TBE poly-acrylamide gels (Life Technologies). Gels were stained with SYBR Gold DNA

stain (Life Technologies) for 30 minutes and imaged with a Gel Doc gel imaging system (Bio-rad). Quantification was based on relative band intensities.

#### *Restriction fragment length polymorphism assay for detection of homologous recombination*

HEK 293FT and N2A cells were transfected with plasmid DNA, and incubated at 37°C for 72 hours before genomic DNA extraction as described above. The target genomic region was PCR amplified using primers outside the homology arms of the homologous recombination (HR) template. PCR products were separated on a 1% agarose gel and extracted with MinElute GelExtraction Kit (Qiagen). Purified products were digested with *HindIII* (Fermentas) and analyzed on a 6% Novex TBE poly-acrylamide gel (Life Technologies).

#### *RNA extraction and purification*

HEK 293FT cells were maintained and transfected as stated previously. Cells were harvested by trypsinization followed by washing in phosphate buffered saline (PBS). Total cell RNA was extracted with TRI reagent (Sigma) following manufacturer's protocol. Extracted total RNA was quantified using Naonodrop (Thermo Scientific) and normalized to same concentration.

#### *Northern blot analysis of crRNA and tracrRNA expression in mammalian cells*

RNAs were mixed with equal volumes of 2X loading buffer (Ambion), heated to 95°C for 5 min, chilled on ice for 1 min and then loaded onto 8% denaturing polyacrylamide gels (SequaGel, National Diagnostics) after pre-running the gel for at least 30 minutes. The samples were electrophoresed for 1.5 hours at 40W limit. Afterwards, the RNA was transferred to Hybond N+ membrane (GE Healthcare) at 300 mA in a semi-dry transfer apparatus (Bio-rad) at room temperature for 1.5 hours. The RNA was crosslinked to the membrane using autocrosslink button on Stratagene UV Crosslinker the Stratalinker (Stratagene). The membrane was pre-hybridized in ULTRAhyb-Oligo Hybridization Buffer (Ambion) for 30 min with rotation at 42°C and then probes were added and hybridized overnight. Probes were ordered from IDT and labeled with [ $\gamma$ -32P] ATP (Perkin Elmer) with T4 polynucleotide kinase (New England Biolabs). The membrane was washed once with pre-warmed (42°C) 2xSSC, 0.5% SDS for 1 min followed by two 30 minute washes at 42°C. The membrane was exposed to phosphor screen for one hour or overnight at room temperature and then scanned with phosphorimager (Typhoon).

## SUPPLEMENTARY FIGURES

Figure S1

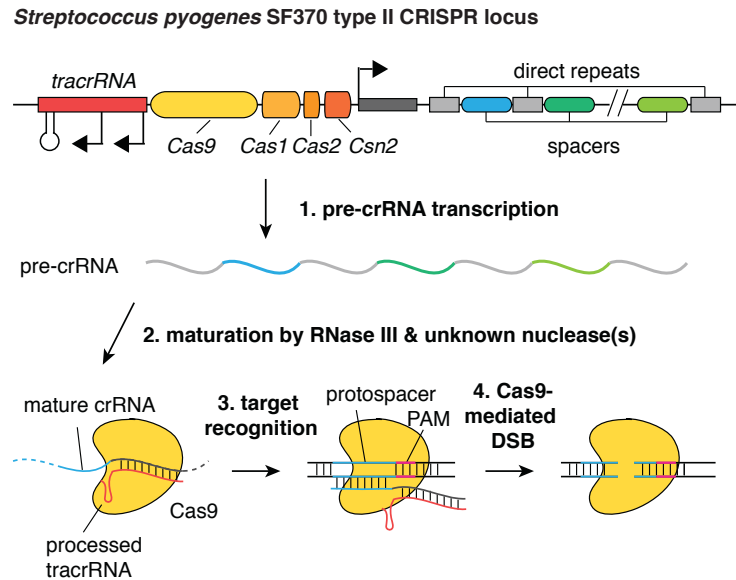

**Fig. S1. Schematic of the type II CRISPR-mediated DNA double-strand break.** The type II CRISPR locus from *Streptococcus pyogenes* SF370 contains a cluster of four genes, *Cas9*, *Cas1*, *Cas2*, and *Csn1*, as well as two non-coding RNA elements, *tracrRNA* and a characteristic array of repetitive sequences (direct repeats) interspaced by short stretches of non-repetitive sequences (spacers, 30bp each) (15-18, 30, 31). Each spacer is typically derived from foreign genetic material (protospacer), and directs the specificity of CRISPR-mediated nucleic acid cleavage. In the target nucleic acid, each protospacer is associated with a protospacer adjacent motif (PAM) whose recognition is specific to individual CRISPR systems (22, 23). The Type II CRISPR system carries out targeted DNA double-strand break (DSB) in sequential steps (12-14, 20, 21). First, the pre-crRNA array and *tracrRNA* are transcribed from the CRISPR locus. Second, *tracrRNA* hybridizes to the direct repeats of pre-crRNA and associates with *Cas9* as a duplex, which mediates the processing of the pre-crRNA into mature crRNAs containing individual, truncated spacer sequences. Third, the mature crRNA:*tracrRNA* duplex directs *Cas9* to the DNA target consisting of the protospacer and the requisite PAM via heteroduplex formation between the spacer region of the crRNA and the protospacer DNA. Finally, *Cas9* mediates cleavage of target DNA upstream of PAM to create a DSB within the protospacer.

**Figure S2**

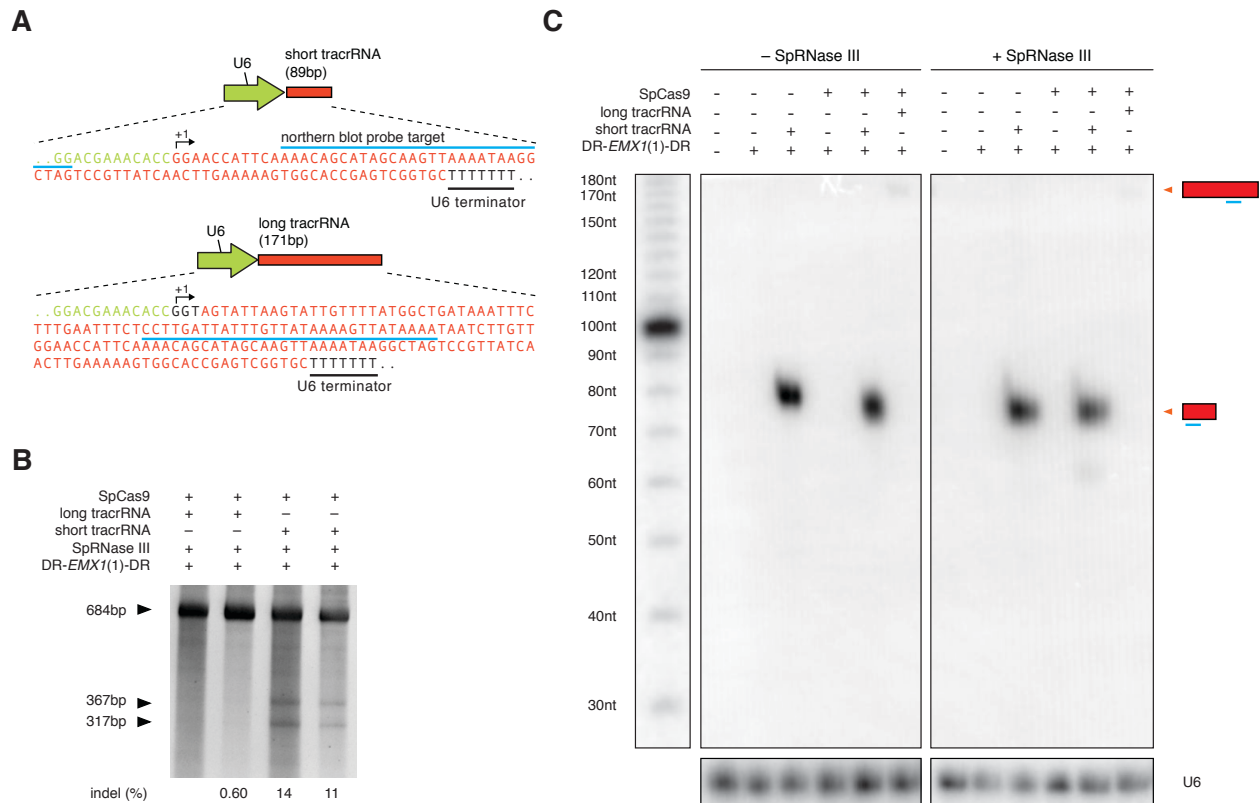

**Fig S2. Comparison of different tracrRNA transcripts for Cas9-mediated gene targeting.**

(A) Schematic showing the design and sequences of two tracrRNA transcripts tested (short and long). Each transcript is driven by a U6 promoter. Transcription start site is marked as +1 and transcription terminator is as indicated. Blue line indicates the region whose reverse-complement sequence is used to generate northern blot probes for tracrRNA detection. (B) SURVEYOR assay comparing the efficiency of SpCas9-mediated cleavage of the *EMX1* locus. Two biological replicates are shown for each tracrRNA transcript. (C) Northern blot analysis of total RNA extracted from 293FT cells transfected with U6 expression constructs carrying long or short tracrRNA, as well as SpCas9 and DR-*EMX1*(1)-DR. Left and right panels are from 293FT cells transfected without or with SpRNase III respectively. U6 indicate loading control blotted with a probe targeting human U6 snRNA. Transfection of the short tracrRNA expression construct led to abundant levels of the processed form of tracrRNA (~75bp) (19). Very low amounts of long tracrRNA are detected on the northern blot. As a result of these experiments, we chose to use short tracrRNA for application in mammalian cells.

**Figure S3**

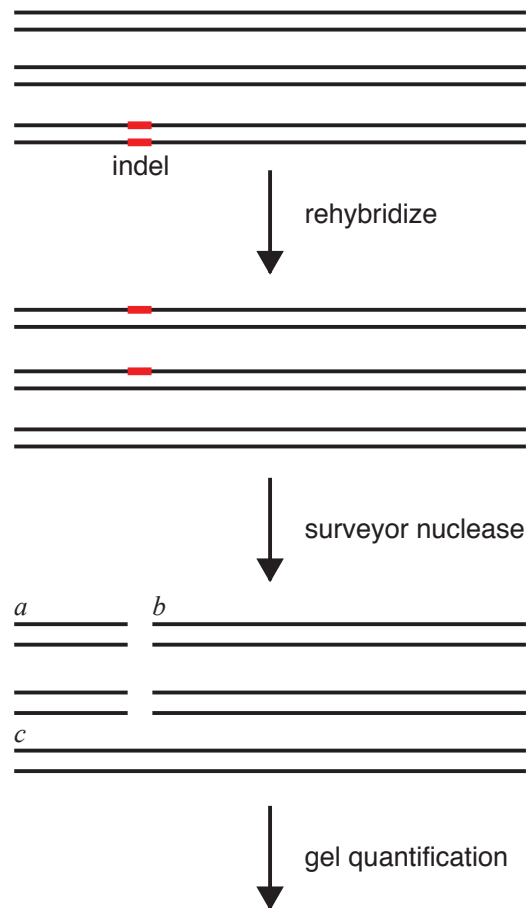

$$\% \text{ indel} = \left( 1 - \sqrt{1 - (a + b)/(a + b + c)} \right) * 100$$

**Fig. S3. SURVEYOR assay for detection of double strand break-induced micro insertions and deletions (32).** Schematic of the SURVEYOR assay used to determine Cas9-mediated cleavage efficiency. First, genomic PCR (gPCR) is used to amplify the Cas9 target region from a heterogeneous population of modified and unmodified cells, and the gPCR products are reannealed slowly to generate heteroduplexes. The reannealed heteroduplexes are cleaved by SURVEYOR nuclease, whereas homoduplexes are left intact. Cas9-mediated cleavage efficiency (% indel) is calculated based on the fraction of cleaved DNA.

**Figure S4**

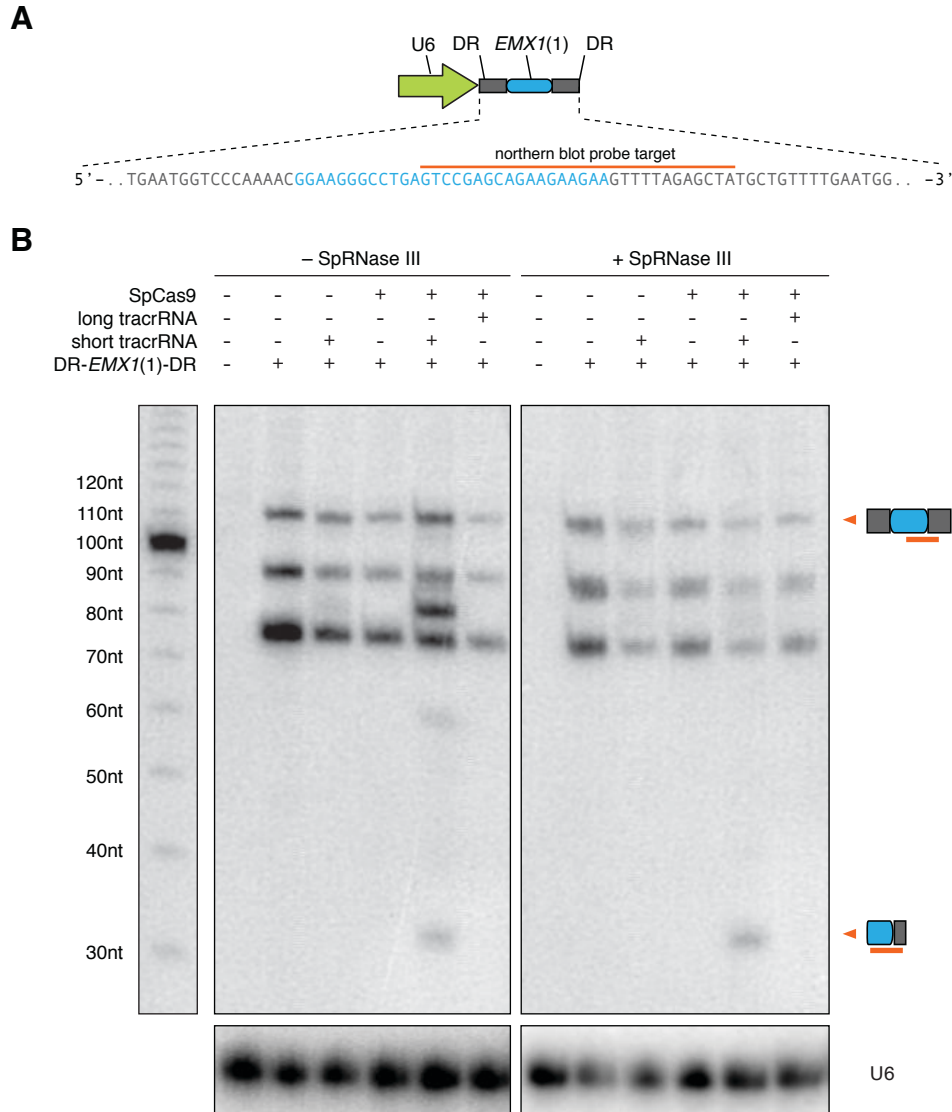

**Fig. S4. Northern blot analysis of crRNA processing in mammalian cells.** (A) Schematic showing the expression vector for a single spacer flanked by two direct repeats (DR-*EMXI(1)*-DR). The 30bp spacer targeting the human *EMXI* locus protospacer 1 (Table S1) is shown in blue and direct repeats are shown in gray. Orange line indicates the region whose reverse-complement sequence is used to generate northern blot probes for *EMXI(1)* crRNA detection. (B) Northern blot analysis of total RNA extracted from 293FT cells transfected with U6 expression constructs carrying DR-*EMXI(1)*-DR. Left and right panels are from 293FT cells transfected without or with SpRNase III respectively. DR-*EMXI(1)*-DR was processed into

mature crRNAs only in the presence of SpCas9 and short tracrRNA, and was not dependent on the presence of SpRNase III. The mature crRNA detected from transfected 293FT total RNA is ~33bp and is shorter than the 39-42bp mature crRNA from *S. pyogenes* (19), suggesting that the processed mature crRNA in human 293FT cells is likely different from the bacterial mature crRNA in *S. pyogenes*.





**Figure S6**

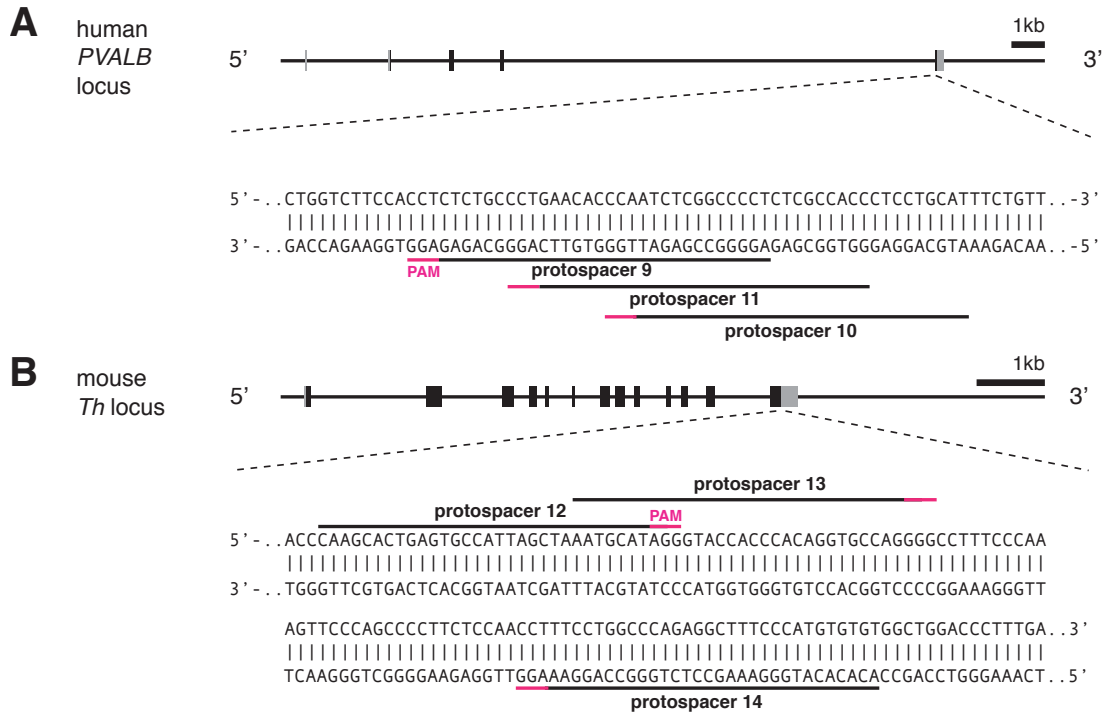

**Fig. S6. Selection of protospacers in the human *PVALB* and mouse *Th* loci.** Schematic of the human *PVALB* (**A**) and mouse *Th* (**B**) loci and the location of the three protospacers within the last exon of the *PVALB* and *Th* genes, respectively. The 30bp protospacers are indicated by black lines and the adjacent PAM sequences are indicated by the magenta bar. Protospacers on the sense and anti-sense strands are indicated above and below the DNA sequences respectively.

**Figure S7**

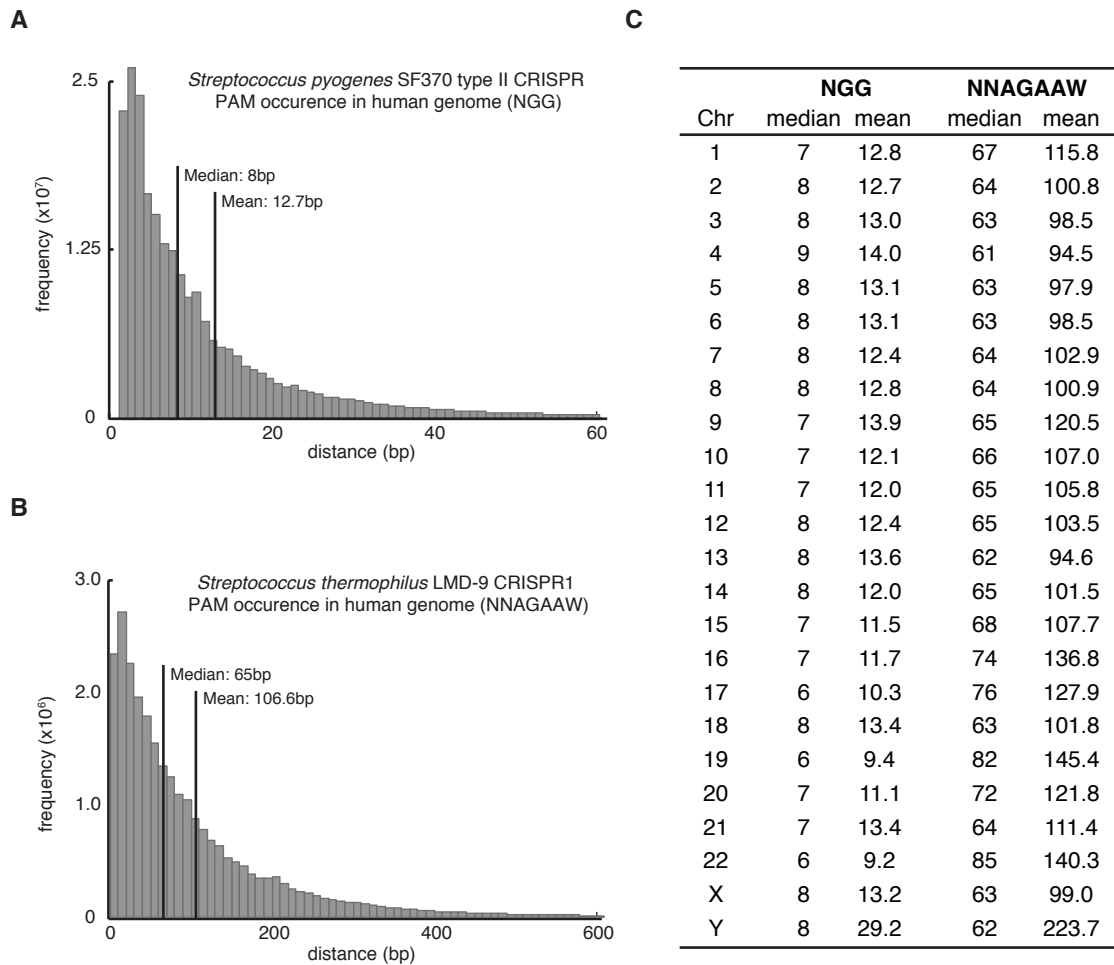

**Fig. S7. Occurrences of PAM sequences in the human genome.** Histograms of distances between adjacent *Streptococcus pyogenes* SF370 type II CRISPR PAM (NGG) (**A**) and *Streptococcus thermophilus* LMD-9 CRISPR1 PAM (NNAGAAW) (**B**) in the human genome. (**C**) Distances for each PAM by chromosome. Chr, chromosome. Putative targets were identified using both the plus and minus strands of human chromosomal sequences. Given that there may be chromatin, DNA methylation-, RNA structure, and other factors that may limit the cleavage activity at some protospacer targets, it is important to note that the actual targeting ability might be less than the result of this computational analysis.

**Figure S8**

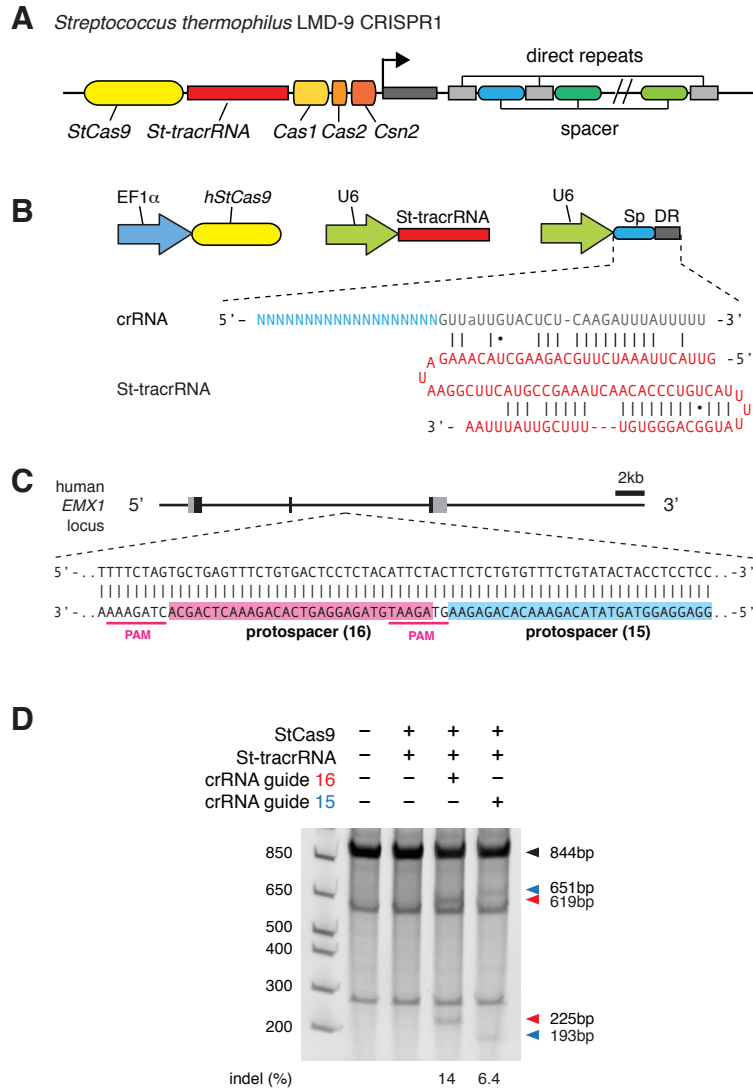

**Fig S8. Type II CRISPR from *Streptococcus thermophilus* LMD-9 can also function in eukaryotic cells.** (A) Schematic of CRISPR locus 2 from *Streptococcus thermophilus* LMD-9. (B) Design of the expression system for the *S. thermophilus* CRISPR system. Human codon-optimized *StCas9* is expressed using a constitutive EF1a promoter. Mature versions of tracrRNA and crRNA are expressed using the U6 promoter to ensure precise transcription initiation. Sequences for the mature crRNA and tracrRNA are shown. A single based indicated by the lower case “a” in the crRNA sequence was used to remove the polyU sequence, which serves as a RNA Pol III transcriptional terminator. Sp, spacer. (C) Schematic showing protospacer and

corresponding PAM sequences targets in the human *EMXI* locus. Two protospacer sequences are highlighted and their corresponding PAM sequences satisfying the NNAGAAW motif are indicated by magenta lines. Both protospacers are targeting the anti-sense strand. **(D)** SURVEYOR assay showing StCas9-mediated cleavage in the target locus. RNA guide spacers 1 and 2 induced 14% and 6.4% respectively. Statistical analysis of cleavage activity across biological replica at these two protospacer sites can be found in Table S1.

**Table S1. Protospacer sequences and modification efficiencies of mammalian genomic targets.** Protospacer targets designed based on *Streptococcus pyogenes* type II CRISPR and *Streptococcus thermophilus* CRISPR1 loci with their requisite PAMs against three different genes in human and mouse genomes. Cells were transfected with Cas9 and either pre-crRNA/tracrRNA or chimeric RNA. Cells were analyzed 72 hours after transfection. Percent indels are calculated based on SURVEYOR assay results from indicated cell lines,  $N = 3$  for all protospacer targets, errors are S.E.M. N.D., not detectable using the SURVEYOR assay; N.T., not tested in this study.

| Cas9                                          | target species      | gene         | protospacer ID | protospacer sequence (5' to 3') | PAM     | strand | cell line tested | % indel (pre-crRNA + tracrRNA) | % indel (chimeric RNA) |
|-----------------------------------------------|---------------------|--------------|----------------|---------------------------------|---------|--------|------------------|--------------------------------|------------------------|
| <i>S. pyogenes</i><br>SF370 type II<br>CRISPR | <i>Homo sapiens</i> | <i>EMX1</i>  | 1              | GGAAGGGCCTGAGTCCGAGCAGAAGAAGAA  | GGG     | +      | 293FT            | 20 ± 1.8                       | 6.7 ± 0.62             |
|                                               |                     |              | 2              | CATTGGAGGTGACATCGATGTCCTCCCAT   | TGG     | -      | 293FT            | 2.1 ± 0.31                     | N.D.                   |
|                                               |                     |              | 3              | GGACATCGATGTCACCTCCAATGACTAGGG  | TGG     | +      | 293FT            | 14 ± 1.1                       | N.D.                   |
|                                               |                     |              | 4              | CATCGATGTCCTCCCATTTGGCCTGCTTCG  | TGG     | -      | 293FT            | 11 ± 1.7                       | N.D.                   |
|                                               |                     |              | 5              | TTCTGGCAATGCGCCACCGTTGATGTGA    | TGG     | -      | 293FT            | 4.3 ± 0.46                     | 2.1 ± 0.51             |
|                                               |                     |              | 6              | TCGTGGCAATGCGCCACCGTTGATGTGAT   | GGG     | -      | 293FT            | 4.0 ± 0.66                     | 0.41 ± 0.25            |
|                                               |                     |              | 7              | TCCAGCTTCTGCCGTTTGTACTTTGTCCTC  | CGG     | -      | 293FT            | 1.5 ± 0.12                     | N.D.                   |
|                                               |                     |              | 8              | GGAGGGAGGGGCACAGATGAGAACTCAGG   | AGG     | -      | 293FT            | 7.8 ± 0.83                     | 2.3 ± 1.2              |
|                                               | <i>Homo sapiens</i> | <i>PVALB</i> | 9              | AGGGGCCGAGATTGGGTGTTTCAGGGCAGAG | AGG     | +      | 293FT            | 21 ± 2.6                       | 6.5 ± 0.32             |
|                                               |                     |              | 10             | ATGCAGGAGGGTGGCCGAGAGGGGCCGAGAT | TGG     | +      | 293FT            | N.D.                           | N.D.                   |
|                                               |                     |              | 11             | GGTGGCGAGAGGGGCCGAGATTGGGTGTTTC | AGG     | +      | 293FT            | N.D.                           | N.D.                   |
|                                               | <i>Mus musculus</i> | <i>Th</i>    | 12             | CAAGCACTGAGTGCCATTAGCTAAATGCAT  | AGG     | -      | Neuro2A          | 27 ± 4.3                       | 4.1 ± 2.2              |
|                                               |                     |              | 13             | AATGCATAGGGTACCACCCACAGGTGCCAG  | GGG     | -      | Neuro2A          | 4.8 ± 1.2                      | N.D.                   |
|                                               |                     |              | 14             | ACACACATGGGAAAGCCTCTGGGCCAGGAA  | AGG     | +      | Neuro2A          | 11.3 ± 1.3                     | N.D.                   |
| <i>S. thermophilus</i><br>LMD-9 CRISPR1       | <i>Homo sapiens</i> | <i>EMX1</i>  | 15             | GGAGGAGGTAGTATACAGAAACACAGAGAA  | GTAGAAT | -      | 293FT            | 14 ± 0.88                      | N.T.                   |
|                                               |                     |              | 16             | AGAATGTAGAGGAGTCACAGAAACTCAGCA  | CTAGAAA | -      | 293FT            | 7.8 ± 0.77                     | N.T.                   |

**Table S2. Sequences for primers and probes used for SURVEYOR assay, RFLP assay, genomic sequencing, and Northern blot.**

| <b>Primer name</b> | <b>Assay</b>                  | <b>Genomic Target</b> | <b>Primer sequence</b>        |
|--------------------|-------------------------------|-----------------------|-------------------------------|
| Sp-EMX1-F          | SURVEYOR<br>assay, sequencing | <i>EMX1</i>           | AAAACCACCCTTCTCTCTGGC         |
| Sp-EMX1-R          | SURVEYOR<br>assay, sequencing | <i>EMX1</i>           | GGAGATTGGAGACACGGAGAG         |
| Sp-PVALB-F         | SURVEYOR<br>assay, sequencing | <i>PVALB</i>          | CTGGAAAGCCAATGCCTGAC          |
| Sp-PVALB-R         | SURVEYOR<br>assay, sequencing | <i>PVALB</i>          | GGCAGCAAACCTCCTTGTCT          |
| Sp-Th-F            | SURVEYOR<br>assay, sequencing | <i>Th</i>             | GTGCTTTGCAGAGGCCTACC          |
| Sp-Th-R            | SURVEYOR<br>assay, sequencing | <i>Th</i>             | CCTGGAGCGCATGCAGTAGT          |
| St-EMX1-F          | SURVEYOR<br>assay, sequencing | <i>EMX1</i>           | ACCTTCTGTGTTTCCACCATTC        |
| St-EMX1-R          | SURVEYOR<br>assay, sequencing | <i>EMX1</i>           | TTGGGGAGTGCACAGACTTC          |
| Sp-EMX1-<br>RFLP-F | RFLP,<br>sequencing           | <i>EMX1</i>           | GGCTCCCTGGGTTCAAAGTA          |
| Sp-EMX1-<br>RFLP-R | RFLP,<br>sequencing           | <i>EMX1</i>           | AGAGGGGTCTGGATGTCGTAA         |
| Pb_EMX1_sp1        | Northern Blot<br>Probe        | Not<br>applicable     | TAGCTCTAAACTTCTTCTTCTGCTCGGAC |
| Pb_tracrRNA        | Northern Blot<br>Probe        | Not<br>applicable     | CTAGCCTTATTTAACTTGCTATGCTGTTT |

## SUPPLEMENTARY SEQUENCES

> U6-short tracrRNA (*Streptococcus pyogenes* SF370)

GAGGGCCTATTTCCCATGATTCCTTCATATTTGCATATACGATACAAGGCTGTTAGAGAGATAA  
TTGGAATTAATTTGACTGTAAACACAAAGATATTAGTACAAAATACGTGACGTAGAAAGTAATA  
ATTTCTTGGGTAGTTTGCAGTTTTAAAATTATGTTTTAAAATGGACTATCATATGCTTACCGTA  
ACTTGAAAGTATTTTCGATTTCTTGGCTTTATATATCTTGTGGAAAGGACGAAACACCGGAACCA  
TTCAAACAGCATAGCAAGTTAAAATAAGGCTAGTCCGTTATCAACTTGAAAAAGTGGCACCGA  
GTCGGTGCTTTTTTT

> U6-long tracrRNA (*Streptococcus pyogenes* SF370)

GAGGGCCTATTTCCCATGATTCCTTCATATTTGCATATACGATACAAGGCTGTTAGAGAGATAA  
TTGGAATTAATTTGACTGTAAACACAAAGATATTAGTACAAAATACGTGACGTAGAAAGTAATA  
ATTTCTTGGGTAGTTTGCAGTTTTAAAATTATGTTTTAAAATGGACTATCATATGCTTACCGTA  
ACTTGAAAGTATTTTCGATTTCTTGGCTTTATATATCTTGTGGAAAGGACGAAACACCGGTAGTA  
TTAAGTATTGTTTTATGGCTGATAAATTTCTTTGAATTTCTCCTTGATTATTTGTTATAAAAGT  
TATAAAATAATCTTGTGGAAACCATTCAAACAGCATAGCAAGTTAAAATAAGGCTAGTCCGTT  
ATCAACTTGAAAAAGTGGCACCGAGTCGGTGCTTTTTTT

> U6-DR-BbsI backbone-DR (*Streptococcus pyogenes* SF370)

GAGGGCCTATTTCCCATGATTCCTTCATATTTGCATATACGATACAAGGCTGTTAGAGAGATAA  
TTGGAATTAATTTGACTGTAAACACAAAGATATTAGTACAAAATACGTGACGTAGAAAGTAATA  
ATTTCTTGGGTAGTTTGCAGTTTTAAAATTATGTTTTAAAATGGACTATCATATGCTTACCGTA  
ACTTGAAAGTATTTTCGATTTCTTGGCTTTATATATCTTGTGGAAAGGACGAAACACCGGGTTTT  
AGAGCTATGCTGTTTTGAATGGTCCCAAACGGGTCTTCGAGAAGACGTTTTAGAGCTATGCTG  
TTTTGAATGGTCCCAAAC

> U6-chimeric RNA-BbsI backbone (*Streptococcus pyogenes* SF370)

GAGGGCCTATTTCCCATGATTCCTTCATATTTGCATATACGATACAAGGCTGTTAGAGAGATAA  
TTGGAATTAATTTGACTGTAAACACAAAGATATTAGTACAAAATACGTGACGTAGAAAGTAATA  
ATTTCTTGGGTAGTTTGCAGTTTTAAAATTATGTTTTAAAATGGACTATCATATGCTTACCGTA  
ACTTGAAAGTATTTTCGATTTCTTGGCTTTATATATCTTGTGGAAAGGACGAAACACCGGGTCTT  
CGAGAAGACCTGTTTTAGAGCTAGAAATAGCAAGTTAAAATAAGGCTAGTCCG

> 3xFLAG-NLS-SpCas9-NLS

ATGGACTATAAGGACCACGACGGAGACTACAAGGATCATGATATTGATTACAAAGACGATGACG  
ATAAGATGGCCCCAAGAAGAAGCGGAAGGTTCGGTATCCACGGAGTCCCAGCAGCCGACAAGAA  
GTACAGCATCGGCCTGGACATCGGCACCAACTCTGTGGGCTGGGCCGTGATCACCAGCAGTAC  
AAGGTGCCAGCAAGAAATTCAAGGTGCTGGGCAACACCGACCGGCACAGCATCAAGAAGAACC  
TGATCGGAGCCCTGCTGTTTCGACAGCGGCGAAACAGCCGAGGCCACCCGGCTGAAGAGAACCGC  
CAGAAGAAGATACACCAGACGGAAGAACCGGATCTGCTATCTGCAAGAGATCTTCAGCAACGAG  
ATGGCCAAGGTGGACGACAGCTTCTCCACAGACTGGAAGAGTCCTTCCTGGTGAAGAGGATA  
AGAAGCACGAGCGGCACCCCATCTTCGGCAACATCGTGGACGAGGTGGCCTACCACGAGAAGTA  
CCCCACCATCTACCACCTGAGAAAGAACTGGTGGACAGCACCGACAAGGCCGACCTGCGGCTG  
ATCTATCTGGCCCTGGCCCACATGATCAAGTTCGGGGCCACTTCCTGATCGAGGGCGACCTGA  
ACCCCGACAACAGCGACGTGGACAAGCTGTTTCATCCAGCTGGTGCAGACCTACAACCAGCTGTT  
CGAGGAAAACCCCATCAACGCCAGCGGCGTGGACGCCAAGGCCATCCTGTCTGCCAGACTGAGC



AAGAGCAGACGGCTGGAAAATCTGATCGCCAGCTGCCCGGCGAGAAGAAGAATGGCCTGTTCG  
GCAACCTGATTGCCCTGAGCCTGGGCCTGACCCCAACTTCAAGAGCAACTTCGACCTGGCCGA  
GGATGCCAAACTGCAGCTGAGCAAGGACACCTACGACGACGACCTGGACAACCTGCTGGCCCAG  
ATCGGCGACCAGTACGCCGACCTGTTTCTGGCCGCCAAGAACCTGTCCGACGCCATCCTGCTGA  
GCGACATCCTGAGAGTGAACACCGAGATCACCAAGGCCCCCTGAGCGCCTCTATGATCAAGAG  
ATACGACGAGCACCACCAGGACCTGACCCTGCTGAAAGCTCTCGTGCGGCAGCAGCTGCCTGAG  
AAGTACAAAGAGATTTTCTTCGACCAGAGCAAGAACGGCTACGCCGGCTACATTGACGGCGGAG  
CCAGCCAGGAAGAGTTCTACAAGTTCATCAAGCCCATCCTGGAAAAGATGGACGGCACCGAGGA  
ACTGCTCGTGAAGCTGAACAGAGAGGACCTGCTGCGGAAGCAGCGGACCTTCGACAACGGCAGC  
ATCCCCCACCAGATCCACCTGGGAGAGCTGCACGCCATTCTGCGGCGGCAGGAAGATTTTTACC  
CATTCTGAAGGACAACCGGGAAAAGATCGAGAAGATCCTGACCTTCCGCATCCCCTACTACGT  
GGGCCCTCTGGCCAGGGGAAACAGCAGATTCGCCTGGATGACCAGAAAGAGCGAGGAAACCATC  
ACCCCTGGAACCTCGAGGAAGTGGTGGACAAGGGCGCTTCCGCCAGAGCTTCATCGAGCGGA  
TGACCAACTTCGATAAGAACCTGCCAACGAGAAGGTGCTGCCAACGACAGCCTGCTGTACGA  
GTACTTCACCGTGTATAACGAGCTGACCAAAGTGAATACGTGACCAGGGGAATGAGAAAGCCC  
GCCTTCTGAGCGGCGAGCAGAAAAAGGCCATCGTGGACCTGCTGTTCAAGACCAACCGGAAAG  
TGACCGTGAAGCAGCTGAAAGAGGACTACTTCAAGAAAATCGAGTGTTCGACTCCGTGGAAAT  
CTCCGGCGTGGAAGATCGGTTCAACGCCTCCCTGGGCACATAACCAGATCTGCTGAAAATTATC  
AAGGACAAGGACTTCTGACAATGAGGAAAACGAGGACATTCTGGAAGATATCGTGCTGACCC  
TGACACTGTTTGAGGACAGAGAGATGATCGAGGAACGGCTGAAAACCTATGCCACCTGTTTGA  
CGACAAAGTGATGAAGCAGCTGAAGCGGCGGAGATACACCGGCTGGGGCAGGCTGAGCCGGAAG  
CTGATCAACGGCATCCGGGACAAGCAGTCCGGCAAGACAATCCTGGATTCTCTGAAGTCCGACG  
GCTTCGCCAACAGAACTTCATGCAGCTGATCCACGACGACAGCCTGACCTTTAAAGAGGACAT  
CCAGAAAGCCAGGTGTCCGGCCAGGGCGATAGCCTGCACGAGCACATTGCCAATCTGGCCGGC  
AGCCCCGCCATTAAGAAGGGCATCCTGCAGACAGTGAAGGTGGTGGACGAGCTCGTGAAAGTGA  
TGGGCCGGCACAAGCCCGAGAACATCGTGATCGAAATGGCCAGAGAGAACCAGACCACCAGAA  
GGACAGAAGAACAGCCGCGAGAGAATGAAGCGGATCGAAGAGGGCATCAAGAGCTGGGCAGC  
CAGATCCTGAAAGAACACCCCGTGGAAAACACCCAGCTGCAGAACGAGAAGCTGTACCTGTACT  
ACCTGCAGAATGGGCGGGATATGTACGTGGACCAGGAACTGGACATCAACCGGCTGTCCGACTA  
CGATGTGGACCATATCGTGCCTCAGAGCTTCTGAAGGACGACTCCATCGACAACAAGGTGCTG  
ACCAGAAGCGACAAGAACCAGGGCAAGAGCGACAACGTGCCCTCCGAAGAGGTCGTGAAGAAGA  
TGAAGAATACTGGCGGCAGCTGCTGAACGCCAAGCTGATTACCCAGAGAAAGTTCGACAATCT  
GACCAAGGCCGAGAGAGGGCGGCTGAGCGAACTGGATAAGGCCGGCTTCATCAAGAGACAGCTG  
GTGGAAACCCGGCAGATCACAAAGCACGTGGCACAGATCCTGGACTCCCGGATGAACACTAAGT  
ACGACGAGAATGACAAGCTGATCCGGGAAGTGAAAGTGATCACCTGAAGTCCAAGCTGGTGTCT  
CGATTTCCGGAAGGATTTCCAGTTTTACAAAGTGCGCGAGATCAACAACCTACCACCACGCCAC  
GACGCCTACCTGAACGCCGTCTGTGGAAACCGCCCTGATCAAAAAGTACCCTAAGCTGGAAAGCG  
AGTTCGTGTACGGCGACTACAAGGTGTACGACGTGCGGAAGATGATCGCCAAGAGCGAGCAGGA  
AATCGGCAAGGCTACCGCCAAGTACTTCTTCTACAGCAACATCATGAACTTTTTCAAGACCGAG  
ATTACCCTGGCCAACGGCGAGATCCGGAAGCGGCCTCTGATCGAGACAAACGGCGAAACCGGGG  
AGATCGTGTGGGATAAGGGCCGGGATTTTGCCACCGTGCAGAAAGTGCTGAGCATGCCCAAGT  
GAATATCGTGAAAAAGACCGAGGTGCAGACAGGCGGCTTACGCAAAAGAGTCTATCCTGCCAAG  
AGGAACAGCGATAAGCTGATCGCCAGAAAGAAGGACTGGGACCCTAAGAAGTACGGCGGCTTCG  
ACAGCCCCACCGTGGCCTATTCTGTGCTGGTGGTGGCCAAAGTGGAAAAGGGCAAGTCCAAGAA  
ACTGAAGAGTGTGAAAGAGCTGCTGGGGATCACCATCATGGAAAGAAGCAGCTTCGAGAAGAAT  
CCCATCGACTTTCTGGAAGCCAAGGGCTACAAAGAAGTGGAAAAGGACCTGATCATCAAGCTGC  
CTAAGTACTCCCTGTTTCGAGCTGGAAAACGGCCGGAAGAGAATGCTGGCCTCTGCCGGCGAACT  
GCAGAAGGGAAACGAACCTGGCCCTGCCCTCCAAATATGTGAACTTCTGTACCTGGCCAGCCAC

TATGAGAAGCTGAAGGGCTCCCCGAGGATAATGAGCAGAAACAGCTGTTTGTGGAACAGCACA  
AGCACTACCTGGACGAGATCATCGAGCAGATCAGCGAGTTCTCCAAGAGAGTGATCCTGGCCGA  
CGCTAATCTGGACAAAGTGCTGTCCGCCTACAACAAGCACCGGGATAAGCCCATCAGAGAGCAG  
GCCGAGAATATCATCCACCTGTTTACCCTGACCAATCTGGGAGCCCCTGCCGCCTTCAAGTACT  
TTGACACCACCATCGACCGGAAGAGGTACACCAGCACCAAGAGGTGCTGGACGCCACCCTGAT  
CCACCAGAGCATCACCGCCTGTACGAGACACGGATCGACCTGTCTCAGCTGGGAGGCGACAAG  
CGTCCTGCTGCTACTAAGAAAGCTGGTCAAGCTAAGAAAAAGAAA

> SpRNase3-mCherry-NLS

ATGAAGCAGCTGGAGGAGTTACTTTCTACCTCTTTTCGACATCCAGTTTAATGACCTGACCCTGC  
TGAAACCGCCTTCACTCACACCTCCTACGCGAATGAGCACCGCCTACTGAATGTGAGCCACAA  
CGAGCGCCTGGAGTTTCTGGGGGATGCTGTCTTACAGCTGATCATCTCTGAATATCTGTTTGCC  
AAATACCCTAAGAAAACCGAAGGGGACATGTCAAAGCTGCGCTCCATGATAGTCAGGGAAGAGA  
GCCTGGCGGGCTTTAGTCGTTTTTGTCTATTTCGACGCTTATATCAAGCTGGGAAAAGGCGAAGA  
GAAGTCCGGCGGCAGGAGGCGCGATAACAATTCTGGGCGATCTCTTTGAAGCGTTTCTGGGCGCA  
CTTCTACTGGACAAAGGGATCGACGCAGTCCGCCGCTTTCTGAAACAAGTGATGATCCCTCAGG  
TCGAAAAGGGAACTTTCGAGAGAGTGAAGGACTATAAAACATGTTTGCAGGAATTTCTCCAGAC  
CAAGGGAGATGTAGCAATAGATTATCAGGTAATAAGTGAGAAAGGACCAGCTCACGCCAAACAA  
TTCGAAGTTAGCATCGTTGTTAATGGCGCAGTGTTGTCGAAGGGCTTGGGTAAATCAAAAAAAC  
TGCCCGAGCAGGACGCTGCTAAAAACGCCCTCGCTCAGCTCAGCGAGGTAGGATCCGTGAGCAA  
GGGCGAGGAGGATAACATGGCCATCATCAAGGAGTTCATGCGCTTCAAGGTGCACATGGAGGGC  
TCCGTGAACGGCCACGAGTTCGAGATCGAGGGCGAGGGCGAGGGCCGCCCTACGAGGGCACCC  
AGACCGCCAAGCTGAAGGTGACCAAGGGTGGCCCCCTGCCCTTCGCCTGGGACATCCTGTCCCC  
TCAGTTCATGTACGGCTCCAAGGCCTACGTGAAGCACCCCGCCGACATCCCCGACTACTTGAAG  
CTGTCTTCCCCGAGGGCTTCAAGTGGGAGCGCGTGATGAACCTTCGAGGACGGCGGCGTGGTGA  
CCGTGACCCAGGACTCCTCCCTGCAGGACGGCGAGTTCATCTACAAGGTGAAGCTGCGCGGCAC  
CAACTTCCCCTCCGACGGCCCCGTAATGCAGAAGAAGACCATGGGCTGGGAGGCCTCCTCCGAG  
CGGATGTACCCCGAGGACGGCGCCCTGAAGGGCGAGATCAAGCAGAGGCTGAAGCTGAAGGACG  
GCGGCCACTACGACGCTGAGGTCAAGACCACCTACAAGGCCAAGAAGCCCGTGCAGCTGCCCGG  
CGCCTACAACGTCAACATCAAGTTGGACATCACCTCCCACAACGAGGACTACACCATCGTGGAA  
CAGTACGAACGCGCCGAGGGCCGCACTCCACCGGCGGCATGGACGAGCTGTACAAGAAGCGTC  
CTGCTGCTACTAAGAAAGCTGGTCAAGCTAAGAAAAAGAAA

> 3xFLAG-NLS-SpCas9n-NLS (the D10A nickase mutation is labeled  
in red)

ATGGACTATAAGGACCACGACGGAGACTACAAGGATCATGATATTGATTACAAAGACGATGACG  
ATAAGATGGCCCCAAGAAGAAGCGGAAGGTTCGGTATCCACGGAGTCCCAGCAGCCGACAAGAA  
GTACAGCATCGGCCTG**GCC**ATCGGCACCAACTCTGTGGGCTGGGCCGTGATCACCGACGAGTAC  
AAGGTGCCAGCAAGAAATTCAAGGTGCTGGGCAACACCGACCGGCACAGCATCAAGAAGAACC  
TGATCGGAGCCCTGCTGTTTCGACAGCGGCGAAACAGCCGAGGCCACCCGGCTGAAGAGAACCGC  
CAGAAGAAGATACACCAGACGGAAGAACCGGATCTGCTATCTGCAAGAGATCTTCAGCAACGAG  
ATGGCCAAGGTGGACGACAGCTTCTTCCACAGACTGGAAGAGTCCTTCTGGTGGAAAGAGGATA  
AGAAGCACGAGCGGCACCCCATCTTCGGCAACATCGTGGACGAGGTGGCCTACCACGAGAAGTA  
CCCCACCATCTACCACCTGAGAAAGAACTGGTGGACAGCACCGACAAGGCCGACCTGCGGCTG  
ATCTATCTGGCCCTGGCCCACATGATCAAGTTCGGGGCCACTTCCTGATCGAGGGCGACCTGA  
ACCCCGACAACAGCGACGTGGACAAGCTGTTTCATCCAGCTGGTGCAGACCTACAACCAGCTGTT  
CGAGGAAAACCCATCAACGCCAGCGGCGTGGACGCCAAGGCCATCCTGTCTGCCAGACTGAGC  
AAGAGCAGACGGCTGGAAAATCTGATCGCCAGCTGCCCGGCGAGAAGAAGAATGGCCTGTTTCG

GCAACCTGATTGCCCTGAGCCTGGGCCTGACCCCAACTTCAAGAGCAACTTCGACCTGGCCGA  
GGATGCCAAACTGCAGCTGAGCAAGGACACCTACGACGACGACCTGGACAACCTGCTGGCCCAG  
ATCGGCGACCAGTACGCCGACCTGTTTTCTGGCCGCCAAGAACCTGTCCGACGCCATCCTGCTGA  
GCGACATCCTGAGAGTGAACACCGAGATCACCAAGGCCCCCTGAGCGCCTCTATGATCAAGAG  
ATACGACGAGCACCACCAGGACCTGACCCTGCTGAAAGCTCTCGTGCGGCAGCAGCTGCCTGAG  
AAGTACAAAGAGATTTTCTTCGACCAGAGCAAGAACGGCTACGCCGGCTACATTGACGGCGGAG  
CCAGCCAGGAAGAGTTCTACAAGTTCATCAAGCCCATCCTGGAAAAGATGGACGGCACCGAGGA  
ACTGCTCGTGAAGCTGAACAGAGAGGACCTGCTGCGGAAGCAGCGGACCTTCGACAACGGCAGC  
ATCCCCCACCAGATCCACCTGGGAGAGCTGCACGCCATTCTGCGGCGGCAGGAAGATTTTTTACC  
CATTCTGAAGGACAACCGGGAAAAGATCGAGAAGATCCTGACCTTCGCATCCCCTACTACGT  
GGGCCCTCTGGCCAGGGGAAACAGCAGATTGCTGATGACCAGAAAGAGCGAGGAAACCATC  
ACCCCTGGAACCTTCGAGGAAGTGGTGGACAAGGGCGCTTCCGCCAGAGCTTCATCGAGCGGA  
TGACCAACTTCGATAAGAACCTGCCAACGAGAAGGTGCTGCCAACGACAGCCTGCTGTACGA  
GTACTTCACCGTGTATAACGAGCTGACCAAAGTGAAATACGTGACCGAGGGAATGAGAAAGCCC  
GCCTTCTGAGCGGCGAGCAGAAAAAGGCCATCGTGGACCTGCTGTTCAAGACCAACCGGAAAG  
TGACCGTGAAGCAGCTGAAAGAGGACTACTTCAAGAAAATCGAGTGTTCGACTCCGTGGAAAT  
CTCCGGCGTGGAAGATCGGTTCAACGCCCTCCCTGGGCACATAACCACGATCTGCTGAAAATTATC  
AAGGACAAGGACTTCTGACAATGAGGAAAACGAGGACATTCTGGAAGATATCGTGCTGACCC  
TGACACTGTTTGGAGACAGAGAGATGATCGAGGAACGGCTGAAAACCTATGCCACCTGTTCTGA  
CGACAAAGTGATGAAGCAGCTGAAGCGGCGGAGATACACCGGCTGGGGCAGGCTGAGCCGGAAG  
CTGATCAACGGCATCCGGGACAAGCAGTCCGGCAAGACAATCCTGGATTTCTGAAGTCCGACG  
GCTTCGCCAACAGAACTTCATGCAGCTGATCCACGACGACAGCCTGACCTTTAAGAGGACAT  
CCAGAAAGCCAGGTGTCCGGCCAGGGCGATAGCCTGCACGAGCACATTGCCAATCTGGCCGGC  
AGCCCCGCCATTAAGAAGGGCATCCTGCAGACAGTGAAGGTGGTGGACGAGCTCGTGAAAGTGA  
TGGGCCGGCACAAGCCCGAGAACATCGTGATCGAAATGGCCAGAGAGAACCAGACCACCAGAA  
GGGACAGAAGAACAGCCGCGAGAGAATGAAGCGGATCGAAGAGGGCATCAAGAGCTGGGCAGC  
CAGATCCTGAAAGAACACCCCGTGGAAAACACCCAGCTGCAGAACGAGAAGCTGTACCTGTACT  
ACCTGCAGAATGGGCGGGATATGTACGTGGACCAGGAACTGGACATCAACCGGCTGTCCGACTA  
CGATGTGGACCATATCGTGCCTCAGAGCTTTCTGAAGGACGACTCCATCGACAACAAGGTGCTG  
ACCAGAAGCGACAAGAACCAGGGCAAGAGCGACAACGTGCCCTCCGAAGAGGTCGTGAAGAAGA  
TGAAGAACTACTGGCGGCAGCTGCTGAACGCCAAGCTGATTACCCAGAGAAAGTTCGACAATCT  
GACCAAGGCCGAGAGAGGGCGGCTGAGCGAACTGGATAAGGCCGGCTTCATCAAGAGACAGCTG  
GTGGAAACCCGGCAGATCACAAAGCACGTGGCACAGATCCTGGACTCCCGGATGAACACTAAGT  
ACGACGAGAATGACAAGCTGATCCGGGAAGTGAAAGTGATCACCTGAAGTCCAAGCTGGTGTC  
CGATTTCCGGAAGGATTTCCAGTTTTACAAAGTGCGCGAGATCAACAACCTACCACCACGCCAC  
GACGCCTACCTGAACGCCGTCGTGGGAACCGCCCTGATCAAAAAGTACCCTAAGCTGGAAAGCG  
AGTTCGTGTACGGCGACTACAAGGTGTACGACGTGCGGAAGATGATCGCCAAGAGCGAGCAGGA  
AATCGGCAAGGCTACCGCCAAGTACTTCTTCTACAGCAACATCATGAACTTTTTCAAGACCGAG  
ATTACCCTGGCCAACGGCGAGATCCGGAAGCGGCTCTGATCGAGACAAACGGCGAAACCGGGG  
AGATCGTGTGGGATAAGGGCCGGGATTTTGCCACCGTGCAGGAAAGTGCTGAGCATGCCCAAGT  
GAATATCGTGAAAAAGACCGAGGTGCAGACAGGCGGCTTCAGCAAAGAGTCTATCCTGCCAAG  
AGGAACAGCGATAAGCTGATCGCCAGAAAGAAGGACTGGGACCCTAAGAAGTACGGCGGCTTCG  
ACAGCCCCACCGTGGCCTATTCTGTGCTGGTGGTGGCCAAAGTGGAAAAGGGCAAGTCCAAGAA  
ACTGAAGAGTGTGAAAGAGCTGCTGGGGATCACCATCATGGAAAGAAGCAGCTTCGAGAAGAAT  
CCCATCGACTTTCTGGAAGCCAAGGGCTACAAAGAAGTAAAAAGGACCTGATCATCAAGCTGC  
CTAAGTACTCCCTGTTTCGAGCTGGAAAACGGCCGGAAGAGAATGCTGGCCTCTGCCGGCGAACT  
GCAGAAGGGAAACGAACTGGCCCTGCCCTCCAAATATGTGAACTTCTGTACCTGGCCAGCCAC  
TATGAGAAGCTGAAGGGCTCCCCGAGGATAATGAGCAGAAACAGCTGTTTGTGGAACAGCACA

AGCACTACCTGGACGAGATCATCGAGCAGATCAGCGAGTTCTCCAAGAGAGTGATCCTGGCCGA  
CGCTAATCTGGACAAAGTGCTGTCCGCTACAACAAGCACCGGGATAAGCCCATCAGAGAGCAG  
GCCGAGAATATCATCCACCTGTTTACCCTGACCAATCTGGGAGCCCCTGCCGCCTTCAAGTACT  
TTGACACCACCATCGACCGGAAGAGGTACACCAGCACCAAGAGGTGCTGGACGCCACCCTGAT  
CCACCAGAGCATCACCGCCTGTACGAGACACGGATCGACCTGTCTCAGCTGGGAGGCGACAAG  
CGTCCTGCTGCTACTAAGAAAGCTGGTCAAGCTAAGAAAAAGAAA

> hEMX1-HRTemplate-*HindIII*-*NheI*

GAATGCTGCCCTCAGACCCGCTTCCCTCCTGTCTTGTCTGTCCAAGGAGAATGAGGTCTCACT  
GGTGGATTTTCGACTACCCTGAGGAGCTGGCACCTGAGGGACAAGGCCCCCACCTGCCAGCT  
CCAGCCTCTGATGAGGGTGGGAGAGAGCTACATGAGGTTGCTAAGAAAGCCTCCCCTGAAGGA  
GACCACACAGTGTGTGAGGTTGGAGTCTCTAGCAGCGGTTCTGTGCCCCAGGGATAGTCTGG  
CTGTCCAGGCACTGCTCTTGATATAAACACCACCTCCTAGTTATGAAACCATGCCATTCTGCC  
TCTCTGTATGGAAAAGAGCATGGGGCTGGCCCGTGGGGTGGTGTCCACTTTAGGCCCTGTGGGA  
GATCATGGGAACCCACGCAGTGGGTCATAGGCTCTCTCATTTACTACTCACATCCACTCTGTGA  
AGAAGCGATTATGATCTCTCCTCTAGAACTCGTAGAGTCCCATGTCTGCCGGCTTCCAGAGCC  
TGCACTCCTCCACCTTGGCTTGGCTTTGCTGGGGCTAGAGGAGCTAGGATGCACAGCAGCTCTG  
TGACCCTTTGTTTGAGAGGAACAGGAAAACCACCCTTCTCTCTGGCCCACTGTGTCTCTTCT  
GCCCTGCCATCCCCTTCTGTGAATGTTAGACCCATGGGAGCAGCTGGTCAGAGGGGACCCCGC  
CTGGGGCCCCTAACCTATGTAGCCTCAGTCTTCCCATCAGGCTCTCAGCTCAGCCTGAGTGTT  
GAGGCCCCAGTGGCTGCTCTGGGGCCCTCCTGAGTTTCTCATCTGTGCCCTCCCTCCCTGGCC  
CAGGTGAAGGTGTGGTTCCAGAACCAGGAGCAAAGTACAAACGGCAGAAGCTGGAGGAGGAAG  
GGCCTGAGTCCGAGCAGAAGAAGAAGGGCTCCCATCACATCAACCGGTGGCGCATTGCCACGAA  
GCAGGCCAATGGGGAGGACATCGATGTCACCTCCAATGACaagcttgctagcGGTGGGCAACCA  
CAAACCCACGAGGGCAGAGTGCTGCTTGTCTGCTGGCCAGGCCCTGCGTGGGCCCAAGCTGGAC  
TCTGGCCACTCCCTGGCCAGGCTTTGGGGAGGCCTGGAGTCATGGCCCCACAGGGCTTGAAGCC  
CGGGGCCCGCCATTGACAGAGGGACAAGCAATGGGCTGGCTGAGGCCTGGGACCACTTGGCCTTC  
TCCTCGGAGAGCCTGCCTGCCTGGGCGGGCCCCGCCACCGCAGCCTCCCAGCTGCTCTCCG  
TGTCTCCAATCTCCCTTTTGTGTTTGTATGCATTTCTGTTTTAATTTATTTTCCAGGCACCACTGT  
AGTTTAGTGATCCCCAGTGTCCCCCTTCCCTATGGGAATAATAAAAGTCTCTCTCTTAATGACA  
CGGGCATCCAGCTCCAGCCCCAGAGCCTGGGGTGGTAGATTCCGGCTCTGAGGGCCAGTGGGGG  
CTGGTAGAGCAAACGCGTTCAGGGCCTGGGAGCCTGGGGTGGGGTACTGGTGGAGGGGGTCAAG  
GGTAATTCATTAACCTCTCTTTTTGTTGGGGACCCTGGTCTCTACCTCCAGCTCCACAGCAG  
GAGAAACAGGCTAGACATAGGGAAGGGCCATCCTGTATCTTGAGGGAGGACAGGCCAGGTCTT  
TCTTAACGTATTGAGAGGTGGGAATCAGGCCAGGTAGTTCAATGGGAGAGGGAGAGTGCTTCC  
CTCTGCCTAGAGACTCTGGTGGCTTCTCCAGTTGAGGAGAAACCAGAGGAAAGGGGAGGATTGG  
GGTCTGGGGGAGGGAACACCATTACAAAGGCTGACGGTTCCAGTCCGAAGTCGTGGGCCACC  
AGGATGCTCACCTGTCTTGGAGAACCCTGGGCAGGTTGAGACTGCAGAGACAGGGCTTAAGG  
CTGAGCCTGCAACCAGTCCCCAGTGAAGTCAAGGCTCCTCAGCCCAAGAAAGAGCAACGTGCCA  
GGGCCCGCTGAGCTCTTGTGTTACCTG

> NLS-StCsn1-NLS

ATGAAAAGGCCGGCGGCCACGAAAAAGGCCGGCCAGGCAAAAAAGAAAAAGTCCGACCTGGTAC  
TTGGACTGGATATTGGTATCGGTTCCGGTGGGAGTCGGAATCCTCAACAAGGTCACGGGGGAGAT  
CATTACAAGAACTCGCGGATCTTCCCCGCAGCTCAGGCTGAGAACAACCTGGTGCAGGAGAACG  
AATAGGCAGGGCAGGCGACTGGCGAGGAGGAAGAAACACAGGAGAGTCCGATTGAACCGGCTGT  
TCGAGGAGTCCGGTTTGATCACCGACTTTACGAAAATCTCGATTAACCTTAATCCCTATCAGCT  
TCGGGTGAAAGGCCTGACAGACGAACCTTTCGAATGAGGAACCTTTTCATCGCGCTGAAAAACATG

GTCAAGCACAGAGGGATTTCTACCTCGATGACGCCTCGGATGACGGAAATTCCTCAGTAGGAG  
ATTATGCACAGATCGTGAAAGAGA ACTCAAAGCAACTGGAAACAAAGACACCGGGGCAGATCCA  
ACTTGAAAGATAACCAGACATACGGACAGCTCAGAGGAGATTTTACGGTGGAGAAGGACGGTAAA  
AAGCACAGACTCATTAACTGATTTCCACGTCGGCGTACAGATCCGAAGCGCTCCGCATCCTTC  
AGACTCAACAGGAGTTCAACCCGCAAATTA CTGATGAGTTTCATCAACCGCTATTTGGAAATCTT  
GACCGGAAAGCGCAAGTATTATCATGGGCCGGTAATGAGAAATCCAGAACAGATTACGGCCGA  
TACAGA ACTTCGGGGGAAACCTTGGATAACATCTTTGGTATTTTGGATTGGAAAGTGCACCTTTT  
ACCCGGACGAGTTTCGAGCGGCCAAGGCGTCATACACAGCACAAGAGTTTAACTCTTTGAATGA  
TTTGAACA ACTTGACGGTCCCCACGGAGACAAAGAAGCTCTCCAAGAGCAAAAAGAACCAATC  
ATCAACTACGTCAAGAACGAGAAGGCTATGGGGCCAGCGAAGCTGTTCAAGTATATCGCTAAAC  
TTCTCAGCTGTGATGTGGCGGACATCAAAGGGTACCGAATCGACAAGTCGGGAAAAGCGGAAAT  
TCACACGTTTGAAGCATATCGAAAGATGAAAACGTTGGAAACTGGACATTGAGCAGATGGAC  
CGGGAAACGCTCGACAACTGGCATACTGCTCACGTTGAATACTGAACGAGAGGGAAATCCAAG  
AGGCCCTTGAACATGAGTTGCGCGATGGATCGTTCAGCCAGAAGCAGGTGACGA ACTTGTGCA  
ATTCCGCAAGGCGAATAGCTCCATCTTCGGGAAGGGATGGCACAACTTTTCGGTCAA ACTCATG  
ATGGAGTTGATCCCAGA ACTTTATGAGACTTCGGAGGAGCAAATGACGATCTTGACGCGCTTGG  
GGAAACAGAAAACGACAAGCTCATCGAACAAA ACTAAGTACATTGATGAGAAATTTGCTGACGGA  
AGAAATCTATAATCCGGTAGTAGCGAAATCGGTAAGACAAGCGATCAA AATCGTGAACGCGGCG  
ATCAAGGAATATGGTGACTTTGATAACATCGTAATTGAAATGGCTAGAGAGACGAACGAAGATG  
ACGAGAAAAAGGCAATCCAGAAGATCCAGAAGGCCAACAAAGGATGAAAAAGATGCAGCGATGCT  
TAAAGCGGCCAACCAATACAATGGAAAGGCGGAGCTGCCCATTCAGTGTTTCACGGTCATAAA  
CAGTTGGCGACCAAGATCCGACTCTGGCATCAGCAGGGTGAGCGGTGTCTCTACACCGGAAAGA  
CTATCTCCATCCATGACTTGATTAACAATTCGAACCAGTTTGAAGTGGATCATATTCTGCCCT  
GTCAATCACCTTTGACGACTCGCTTGCGAACAAAGGTGCTCGTGTACGCAACGGCAAATCAGGAG  
AAAGGCCAGCGGACTCCGTATCAGGCGCTCGACTCAATGGACGATGCGTGGTCATTCCGGGAGC  
TGAAGGCGTTCGTACGCGAGAGCAAGACACTGAGCAACAAAAGAAAGAGTATCTGCTGACAGA  
GGAGGACATCTCGAAATTCGATGTCAGGAAGAAGTTCATCGAGCGGAATCTTGTGACACTCGC  
TACGCTTCCAGAGTAGTACTGAACGCGCTCCAGGAACACTTTAGAGCGCACAAAATTGACACGA  
AGGTGT CAGTGGTGAGAGGGCAGTTCACATCCCAACTCCGCCGACATTGGGGCATCGAAAAGAC  
GCGGGACACATATCACCATCATGCGGTGGACGCGCTGATTATTGCCGCTTCGTCCAGTTGAAT  
CTCTGGAAAAAGCAGAAGAACACGCTGGTGTCTGATTCGGAGGATCAGCTTTTGGACATCGAAA  
CCGGGGAGCTGATTTCCGACGATGAATACAAAGAATCGGTGTTTAAAGGCACCATATCAGCATTT  
CGTGGACACGCTGAAGAGCAAAGAGTTT GAGGACAGCATCCTCTTTTCGTACCAAGTGGACTCG  
AAGTTTAAATCGCAAGATTT CAGACGCCACAATCTACGCGACGAGGCAGGCGAAGGTGGGCAAAG  
ATAAAGCAGATGAAACCTACGTCCTTGGTAAAATCAAGGACATCTACACTCAGGACGGGTACGA  
TGC GTTCATGAAAATCTACAAGAAGGATAAGTCGAAGTTTCTCATGTACCGCCACGATCCACAG  
ACTTTTCGAAAAGTCATTGAGCCTATTTTGGAGA ACTACCCTAACAAAGCAAATCAACGAGAAAAG  
GGAAAGAAGTCCCGTGCAACCCCTTTCTGAAGTACAAGGAAGAGCACGGTTATATCCGCAAATA  
CTCGAAGAAAGGAAATGGGCCTGAGATTAAGTCGCTTAAGTATTACGACTCAAAGTTGGGTAAAC  
CACATCGACATTACCCCGAAAGACTCCAACAACAAAGTCGTGTTGCAGTCCGTCTCGCCCTGGC  
GAGCAGATGTGTATTTTAAATAAGACGACCGGCAAATATGAGATCCTTGGACTCAAATACGCAGA  
CCTTCAATTGAAAAGGGGACGGGCACTTATAAGATTTCA CAAGAGAAGTACAACGACATCAAG  
AAAAAGGAAGGGGTTCGATT CAGATTTCGGAGTTCAAATTCACCCTCTACAAAACGACCTCCTGC  
TTGTGAAGGACACAGAAACGAAGGAGCAGCAGCTCTTTTCGGTTCCTCTCACGCACGATGCCAA  
ACAAAACATTACGTGCAACTTAAACCTTACGATAAGCAAAGTTTGAAGGGGGAGAGGCACTG  
ATCAAAGTATTGGGTAACGTAGCCAATAGCGGACAGTGTAAGAAAGGGCTGGGAAAGTCCAATA  
TCTCGATCTATAAAGTACGAACAGATGTATTGGGAAACCAGCATATCATCAAAAATGAGGGGGA

TAAACCCAAACTCGATTTCAAGCGTCCTGCTGCTACTAAGAAAGCTGGTCAAGCTAAGAAAAAG  
AAATAA

> U6-St\_tracrRNA(7-97)

GAGGGCCTATTTCCCATGATTCCTTCATATTTGCATATACGATACAAGGCTGTTAGAGAGATAA  
TTGGAATTAATTTGACTGTAAACACAAAGATATTAGTACAAAATACGTGACGTAGAAAAGTAATA  
ATTTCTTGGGTAGTTTGCAGTTTTAAAATTATGTTTTAAAATGGACTATCATATGCTTACCGTA  
ACTTGAAAGTATTTTCGATTTCTTGGCTTTATATATCTTGTGGAAAGGACGAAACACCGTTACTT  
AAATCTTGCAGAAGCTACAAAGATAAGGCTTCATGCCGAAATCAACACCCTGTCATTTTTATGGC  
AGGGTGTTCGTTATTTAA

>EMX1\_TALEN\_Left

ATGGACTATAAGGACCACGACGGAGACTACAAGGATCATGATATTGATTACAAAGACGATGACG  
ATAAGATGGCCCCAAGAAGAAGCGGAAGGTCGGTATCCACGGAGTCCCAGCAGCCGTAGATTT  
GAGAACTTTGGGATATTCACAGCAGCAGCAGGAAAAGATCAAGCCCAAAGTGAGGTGACAGTC  
GCGCAGCATCACGAAGCGCTGGTGGGTTCATGGGTTTACACATGCCACATCGTAGCCTTGTCGC  
AGCACCCCTGCAGCCCTTGGCACGGTCGCCGTCAAGTACCAGGACATGATTGCGGCGTTGCCGGA  
AGCCACACATGAGGCGATCGTCGGTGTGGGGAAACAGTGGAGCGGAGCCCCGAGCGCTTGAGGCC  
CTGTTGACGGTCGCGGGAGAGCTGAGAGGGCCTCCCTTCAGCTGGACACGGGCCAGTTGCTGA  
AGATCGCGAAGCGGGGAGGAGTCACGGCGGTTCGAGGCGGTGCACGCGTGGCGCAATGCGCTCAC  
GGGAGCACCCCTCAACCTGACCCCAGAGCAGGTTCGTGGCAATTGCGAGCAACCACGGGGGAAAG  
CAGGCACTCGAAACCGTCCAGAGGTTGCTGCCTGTGCTGTGCCAAGCGCACGGACTTACGCCAG  
AGCAGGTCGTGGCAATTGCGAGCAACCACGGGGGAAAGCAGGCACTCGAAACCGTCCAGAGGTT  
GCTGCCTGTGCTGTGCCAAGCGCACGGACTAACCCAGAGCAGGTTCGTGGCAATTGCGAGCAAC  
ATCGGGGGAAAGCAGGCACTCGAAACCGTCCAGAGGTTGCTGCCTGTGCTGTGCCAAGCGCACG  
GGTTGACCCCAGAGCAGGTTCGTGGCAATTGCGAGCAACCACGGGGGAAAGCAGGCACTCGAAAC  
CGTCCAGAGGTTGCTGCCTGTGCTGTGCCAAGCGCACGGCCTGACCCCAGAGCAGGTCGTGGCA  
ATTGCGAGCAACCACGGGGGAAAGCAGGCACTCGAAACCGTCCAGAGGTTGCTGCCTGTGCTGT  
GCCAAGCGCACGGACTGACACCAGAGCAGGTTCGTGGCAATTGCGAGCAACATCGGGGGAAAGCA  
GGCACTCGAAACCGTCCAGAGGTTGCTGCCTGTGCTGTGCCAAGCGCACGGACTTACACCCGAA  
CAAGTCGTGGCAATTGCGAGCAACCACGGGGGAAAGCAGGCACTCGAAACCGTCCAGAGGTTGCTG  
TGCCTGTGCTGTGCCAAGCGCACGGACTTACGCCAGAGCAGGTTCGTGGCAATTGCGAGCAACCA  
CGGGGGAAAGCAGGCACTCGAAACCGTCCAGAGGTTGCTGCCTGTGCTGTGCCAAGCGCACGGA  
CTAACCCCAGAGCAGGTTCGTGGCAATTGCGAGCAACATCGGGGGAAAGCAGGCACTCGAAACCG  
TCCAGAGGTTGCTGCCTGTGCTGTGCCAAGCGCACGGGTTGACCCCAGAGCAGGTCGTGGCAAT  
TGCAGCAACATCGGGGGAAAGCAGGCACTCGAAACCGTCCAGAGGTTGCTGCCTGTGCTGTGC  
CAAGCGCACGGCCTGACCCCAGAGCAGGTTCGTGGCAATTGCGAGCAACCACGGGGGAAAGCAGG  
CACTCGAAACCGTCCAGAGGTTGCTGCCTGTGCTGTGCCAAGCGCACGGACTGACACCAGAGCA  
GGTCGTGGCAATTGCGAGCAACCACGGGGGAAAGCAGGCACTCGAAACCGTCCAGAGGTTGCTG  
CCTGTGCTGTGCCAAGCGCACGGACTCACGCCTGAGCAGGTAGTGGCTATTGCATCCAACAACG  
GGGGCAGACCCGCACTGGAGTCAATCGTGGCCAGCTTTCGAGGCCGGACCCCGCTGGCCGC  
ACTCACTAATGATCATCTTGTAGCGCTGGCCTGCCTCGGCGGACGACCCGCTTGGATGCGGTG  
AGAAGGGGCTCCCGCACGCGCCTGCATTGATTAAGCGGACCAACAGAAGGATTCCCGAGAGGA  
CATCACATCGAGTGGCAGGTTCCCAACTCGTGAAGAGTGAACCTGAGGAGAAAAAGTCGGAGCT  
GCGGCACAAATTGAAATACGTACCGCATGAATACATCGAACTTATCGAAATTGCTAGGAACTCG  
ACTCAAGACAGAATCCTTGAGATGAAGGTAATGGAGTTCTTTATGAAGTTTATGGATAACCGAG  
GGAAGCATCTCGGTGGATCACGAAAACCCGACGGAGCAATCTATACGGTGGGGAGCCCATTGA  
TTACGGAGTGATCGTCGACACGAAAGCCTACAGCGGTGGGTACAATCTTCCCATCGGGCAGGCA

GATGAGATGCAACGTTATGTCTGAAGAAAATCAGACCAGGAACAAACACATCAATCCAAATGAGT  
GGTGAAAGTGTATCCTTCATCAGTGACCGAGTTTAAAGTTTTGTTTGTCTCTGGGCATTTCAA  
AGGCAACTATAAGGCCAGCTCACACGGTTGAATCACATTACGAACTGCAATGGTGCGTTTTG  
TCCGTAGAGGAACTGCTCATTGGTGGAGAAATGATCAAAGCGGAACTCTGACACTGGAAGAAG  
TCAGACGCAAGTTTAAACAATGGCGAGATCAATTTCCGCTCA

>EMX1\_TALEN\_Right

ATGGACTATAAGGACCACGACGGAGACTACAAGGATCATGATATTGATTACAAAGACGATGACG  
ATAAGATGGCCCCAAGAAGAAGCGGAAGGTCGGTATCCACGGAGTCCCAGCAGCCGTAGATTT  
GAGAAGTTTGGGATATTCACAGCAGCAGCAGGAAAAGATCAAGCCAAAGTGAGGTGACAGTC  
GCGCAGCATCACGAAGCGCTGGTGGGTCATGGTTTTACACATGCCACATCGTAGCCTTGTCGC  
AGCACCTGCAGCCCTTGGCACGGTCGCCGTCAAGTACCAGGACATGATTGCGGCGTTGCCGGA  
AGCCACACATGAGGCGATCGTCGGTGTGGGGAAACAGTGGAGCGGAGCCCAGCGCTTGAGGCC  
CTGTTGACGGTCGCGGGAGAGCTGAGAGGGCCTCCCTTCAGCTGGACACGGGCCAGTTGCTGA  
AGATCGCGAAGCGGGGAGGAGTCACGGCGGTGAGGCGGTGCACGCGTGGCGCAATGCGCTCAC  
GGGAGCACCCCTCAACCTGACCCAGAGCAGGTCGTGGCAATTGCGAGCAACCACGGGGGAAAG  
CAGGCACTCGAAACCGTCCAGAGGTTGCTGCCTGTGCTGTGCCAAGCGCACGGACTTACGCCAG  
AGCAGGTCGTGGCAATTGCGAGCAACCACGGGGGAAAGCAGGCACTCGAAACCGTCCAGAGGTT  
GCTGCCTGTGCTGTGCCAAGCGCACGGACTAACCCAGAGCAGGTCGTGGCAATTGCGAGCAAC  
CACGGGGGAAAGCAGGCACTCGAAACCGTCCAGAGGTTGCTGCCTGTGCTGTGCCAAGCGCACG  
GGTTGACCCAGAGCAGGTCGTGGCAATTGCGAGCAACATCGGGGGAAAGCAGGCACTCGAAAC  
CGTCCAGAGGTTGCTGCCTGTGCTGTGCCAAGCGCACGGCCTGACCCAGAGCAGGTCGTGGCA  
ATTGCGAGCAACCACGGGGGAAAGCAGGCACTCGAAACCGTCCAGAGGTTGCTGCCTGTGCTGT  
GCCAAGCGCACGGACTGACACCAGAGCAGGTCGTGGCAATTGCGAGCCATGACGGGGGAAAGCA  
GGCACTCGAAACCGTCCAGAGGTTGCTGCCTGTGCTGTGCCAAGCGCACGGACTTACACCCGAA  
CAAGTCGTGGCAATTGCGAGCCATGACGGGGGAAAGCAGGCACTCGAAACCGTCCAGAGGTTG  
TGCCTGTGCTGTGCCAAGCGCACGGACTTACGCCAGAGCAGGTCGTGGCAATTGCGAGCCATGA  
CGGGGGAAAGCAGGCACTCGAAACCGTCCAGAGGTTGCTGCCTGTGCTGTGCCAAGCGCACGGA  
CTAACCCAGAGCAGGTCGTGGCAATTGCGAGCAACGGAGGGGGAAAGCAGGCACTCGAAACCG  
TCCAGAGGTTGCTGCCTGTGCTGTGCCAAGCGCACGGGTTGACCCAGAGCAGGTCGTGGCAAT  
TGCGAGCAACGGAGGGGGAAAGCAGGCACTCGAAACCGTCCAGAGGTTGCTGCCTGTGCTGTG  
CAAGCGCACGGCCTGACCCAGAGCAGGTCGTGGCAATTGCGAGCCATGACGGGGGAAAGCAGG  
CACTCGAAACCGTCCAGAGGTTGCTGCCTGTGCTGTGCCAAGCGCACGGACTGACACCAGAGCA  
GGTCGTGGCAATTGCGAGCAACGGAGGGGGAAAGCAGGCACTCGAAACCGTCCAGAGGTTGCTG  
CCTGTGCTGTGCCAAGCGCACGGACTCACGCCTGAGCAGGTAGTGGCTATTGCATCCAACGGAG  
GGGCAGACCCGCACTGGAGTCAATCGTGGCCAGCTTTCGAGGCCGACCCCGCCTTGATGCGGTG  
ACTACTAATGATCATCTTGTAGCGCTGGCCTGCCTCGGCGGACGACCCGCTTGATGCGGTG  
AGAAGGGGCTCCCGCACGCGCTGCATTGATTAAGCGGACCAACAGAAGGATTCCCGAGAGGA  
CATCACATCGAGTGGCAGGTTCCCAACTCGTGAAGAGTGAACCTGAGGAGAAAAAGTCGGAGCT  
GCGGCACAAATTGAAATACGTACCGCATGAATACATCGAACTTATCGAAATTGCTAGGAACTCG  
ACTCAAGACAGAATCCTTGAGATGAAGGTAATGGAGTTCTTTATGAAGTTTATGGATAACCGAG  
GGAAGCATCTCGGTGGATCACGAAAACCCGACGGAGCAATCTATACGGTGGGGAGCCCATTGA  
TTACGGAGTGATCGTCGACACGAAAGCCTACAGCGGTGGGTACAATCTTCCCATCGGGCAGGCA  
GATGAGATGCAACGTTATGTCTGAAGAAAATCAGACCAGGAACAAACACATCAATCCAAATGAGT  
GGTGAAAGTGTATCCTTCATCAGTGACCGAGTTTAAAGTTTTGTTTGTCTCTGGGCATTTCAA  
AGGCAACTATAAGGCCAGCTCACACGGTTGAATCACATTACGAACTGCAATGGTGCGTTTTG  
TCCGTAGAGGAACTGCTCATTGGTGGAGAAATGATCAAAGCGGAACTCTGACACTGGAAGAAG  
TCAGACGCAAGTTTAAACAATGGCGAGATCAATTTCCGCTCA

## References and Notes

1. M. H. Porteus, D. Baltimore, Chimeric nucleases stimulate gene targeting in human cells. *Science* **300**, 763 (2003). [doi:10.1126/science.1078395](https://doi.org/10.1126/science.1078395) [Medline](#)
2. J. C. Miller *et al.*, An improved zinc-finger nuclease architecture for highly specific genome editing. *Nat. Biotechnol.* **25**, 778 (2007). [doi:10.1038/nbt1319](https://doi.org/10.1038/nbt1319) [Medline](#)
3. J. D. Sander *et al.*, Selection-free zinc-finger-nuclease engineering by context-dependent assembly (CoDA). *Nat. Methods* **8**, 67 (2011). [doi:10.1038/nmeth.1542](https://doi.org/10.1038/nmeth.1542) [Medline](#)
4. A. J. Wood *et al.*, Targeted genome editing across species using ZFNs and TALENs. *Science* **333**, 307 (2011). [doi:10.1126/science.1207773](https://doi.org/10.1126/science.1207773) [Medline](#)
5. M. Christian *et al.*, Targeting DNA double-strand breaks with TAL effector nucleases. *Genetics* **186**, 757 (2010). [doi:10.1534/genetics.110.120717](https://doi.org/10.1534/genetics.110.120717) [Medline](#)
6. F. Zhang *et al.*, Efficient construction of sequence-specific TAL effectors for modulating mammalian transcription. *Nat. Biotechnol.* **29**, 149 (2011). [doi:10.1038/nbt.1775](https://doi.org/10.1038/nbt.1775) [Medline](#)
7. J. C. Miller *et al.*, A TALE nuclease architecture for efficient genome editing. *Nat. Biotechnol.* **29**, 143 (2011). [doi:10.1038/nbt.1755](https://doi.org/10.1038/nbt.1755) [Medline](#)
8. D. Reyon *et al.*, FLASH assembly of TALENs for high-throughput genome editing. *Nat. Biotechnol.* **30**, 460 (2012). [doi:10.1038/nbt.2170](https://doi.org/10.1038/nbt.2170) [Medline](#)
9. J. Boch *et al.*, Breaking the code of DNA binding specificity of TAL-type III effectors. *Science* **326**, 1509 (2009). [doi:10.1126/science.1178811](https://doi.org/10.1126/science.1178811) [Medline](#)
10. M. J. Moscou, A. J. Bogdanove, A simple cipher governs DNA recognition by TAL effectors. *Science* **326**, 1501 (2009). [doi:10.1126/science.1178817](https://doi.org/10.1126/science.1178817) [Medline](#)
11. B. L. Stoddard, Homing endonuclease structure and function. *Q. Rev. Biophys.* **38**, 49 (2005). [doi:10.1017/S0033583505004063](https://doi.org/10.1017/S0033583505004063) [Medline](#)
12. M. Jinek *et al.*, A programmable dual-RNA-guided DNA endonuclease in adaptive bacterial immunity. *Science* **337**, 816 (2012). [doi:10.1126/science.1225829](https://doi.org/10.1126/science.1225829) [Medline](#)
13. G. Gasiunas, R. Barrangou, P. Horvath, V. Siksnys, Cas9-crRNA ribonucleoprotein complex mediates specific DNA cleavage for adaptive immunity in bacteria. *Proc. Natl. Acad. Sci. U.S.A.* **109**, E2579 (2012). [doi:10.1073/pnas.1208507109](https://doi.org/10.1073/pnas.1208507109) [Medline](#)
14. J. E. Garneau *et al.*, The CRISPR/Cas bacterial immune system cleaves bacteriophage and plasmid DNA. *Nature* **468**, 67 (2010). [doi:10.1038/nature09523](https://doi.org/10.1038/nature09523) [Medline](#)
15. H. Deveau, J. E. Garneau, S. Moineau, CRISPR/Cas system and its role in phage-bacteria interactions. *Annu. Rev. Microbiol.* **64**, 475 (2010). [doi:10.1146/annurev.micro.112408.134123](https://doi.org/10.1146/annurev.micro.112408.134123) [Medline](#)
16. P. Horvath, R. Barrangou, CRISPR/Cas, the immune system of bacteria and archaea. *Science* **327**, 167 (2010). [doi:10.1126/science.1179555](https://doi.org/10.1126/science.1179555) [Medline](#)



17. K. S. Makarova *et al.*, Evolution and classification of the CRISPR-Cas systems. *Nat. Rev. Microbiol.* **9**, 467 (2011). [doi:10.1038/nrmicro2577](https://doi.org/10.1038/nrmicro2577) [Medline](#)
18. D. Bhaya, M. Davison, R. Barrangou, CRISPR-Cas systems in bacteria and archaea: versatile small RNAs for adaptive defense and regulation. *Annu. Rev. Genet.* **45**, 273 (2011). [doi:10.1146/annurev-genet-110410-132430](https://doi.org/10.1146/annurev-genet-110410-132430) [Medline](#)
19. E. Deltcheva *et al.*, CRISPR RNA maturation by trans-encoded small RNA and host factor RNase III. *Nature* **471**, 602 (2011). [doi:10.1038/nature09886](https://doi.org/10.1038/nature09886) [Medline](#)
20. R. Sapranauskas *et al.*, The *Streptococcus thermophilus* CRISPR/Cas system provides immunity in *Escherichia coli*. *Nucleic Acids Res.* **39**, 9275 (2011). [doi:10.1093/nar/gkr606](https://doi.org/10.1093/nar/gkr606) [Medline](#)
21. A. H. Magadán, M. E. Dupuis, M. Villion, S. Moineau, Cleavage of phage DNA by the *Streptococcus thermophilus* CRISPR3-Cas system. *PLoS ONE* **7**, e40913 (2012). [doi:10.1371/journal.pone.0040913](https://doi.org/10.1371/journal.pone.0040913) [Medline](#)
22. H. Deveau *et al.*, Phage response to CRISPR-encoded resistance in *Streptococcus thermophilus*. *J. Bacteriol.* **190**, 1390 (2008). [doi:10.1128/JB.01412-07](https://doi.org/10.1128/JB.01412-07) [Medline](#)
23. F. J. Mojica, C. Díez-Villaseñor, J. García-Martínez, C. Almendros, Short motif sequences determine the targets of the prokaryotic CRISPR defence system. *Microbiology* **155**, 733 (2009). [doi:10.1099/mic.0.023960-0](https://doi.org/10.1099/mic.0.023960-0) [Medline](#)
24. M. Jinek, J. A. Doudna, A three-dimensional view of the molecular machinery of RNA interference. *Nature* **457**, 405 (2009). [doi:10.1038/nature07755](https://doi.org/10.1038/nature07755) [Medline](#)
25. C. D. Malone, G. J. Hannon, Small RNAs as guardians of the genome. *Cell* **136**, 656 (2009). [doi:10.1016/j.cell.2009.01.045](https://doi.org/10.1016/j.cell.2009.01.045) [Medline](#)
26. G. Meister, T. Tuschl, Mechanisms of gene silencing by double-stranded RNA. *Nature* **431**, 343 (2004). [doi:10.1038/nature02873](https://doi.org/10.1038/nature02873) [Medline](#)
27. M. T. Certo *et al.*, Tracking genome engineering outcome at individual DNA breakpoints. *Nat. Methods* **8**, 671 (2011). [doi:10.1038/nmeth.1648](https://doi.org/10.1038/nmeth.1648) [Medline](#)
28. P. Mali *et al.*, RNA-guided human genome engineering via Cas9. *Science*, published online 3 January 2013 (10.1126/science.1232033).
29. P. A. Carr, G. M. Church, Genome engineering. *Nat. Biotechnol.* **27**, 1151 (2009). [doi:10.1038/nbt.1590](https://doi.org/10.1038/nbt.1590) [Medline](#)
30. R. Barrangou, P. Horvath, CRISPR: new horizons in phage resistance and strain identification. *Annu Rev Food Sci Technol* **3**, 143 (2012). [doi:10.1146/annurev-food-022811-101134](https://doi.org/10.1146/annurev-food-022811-101134) [Medline](#)
31. S. J. Brouns *et al.*, Small CRISPR RNAs guide antiviral defense in prokaryotes. *Science* **321**, 960 (2008). [doi:10.1126/science.1159689](https://doi.org/10.1126/science.1159689) [Medline](#)
32. D. Y. Guschin *et al.*, A rapid and general assay for monitoring endogenous gene modification. *Methods Mol. Biol.* **649**, 247 (2010). [doi:10.1007/978-1-60761-753-2\\_15](https://doi.org/10.1007/978-1-60761-753-2_15) [Medline](#)
